# Supplementary material for: Fecal Carriage and Molecular Characterization of Carbapenemase-Producing Enterobacterales in the Pediatric Population in Qatar
Source: PubMed Central journal article supplement (PMC8579929; doi:10.1128/spectrum.01122-21), 2021-11-10
Supplement: spectrum01122-21_supp_1_seq7.pdf [file spectrum01122-21_supp_1_seq7.pdf]

**Supplementary Table S1.** Carbapenem-producing Enterobacterales isolated from fecal carriers with history of foreign travel and/or medical care overseas.

| <b>ID</b>               | <b>Age/Gender</b> | <b>Underlying condition</b>            | <b>Foreign country visited</b> | <b>Medical care overseas</b> | <b>Species/ST</b>          | <b>Enzymes</b> |
|-------------------------|-------------------|----------------------------------------|--------------------------------|------------------------------|----------------------------|----------------|
| <b>CP3</b>              | 11 years/F        | Duodenal peptic ulcers                 | India                          | India                        | <i>E. coli</i> /617        | NDM-5          |
| <b>CP5</b>              | 4 months/M        | Imperforate anus & Colonostomy         | Somalia                        | Sudan                        | <i>K. pneumoniae</i> /14   | NDM-1          |
| <b>CP8</b>              | 18 years/M        | CP, GDD & Epilepsy                     | Pakistan                       | Pakistan                     | <i>E. coli</i> /354        | OXA-181        |
| <b>CP9<sup>a</sup></b>  | 6 months/F        | Down syndrome, CHD & Cardiac surgery   | Pakistan                       | Pakistan                     | <i>E. coli</i> /540        | NDM-1          |
| <b>CP15</b>             | 2 years/M         | Previously healthy                     | Egypt                          | Egypt                        | <i>E. coli</i> /167        | NDM-5          |
| <b>CP16</b>             | 1 year/M          | CP, GDD, RLRTI                         | India                          | India                        | <i>C. freundii</i> /ND     | NDM-1          |
| <b>CP17</b>             | 1 year/M          | Previously healthy                     | Egypt                          | NO                           | <i>E. coli</i> /405        | NDM-5          |
| <b>CP18<sup>b</sup></b> | 6 years/M         | HLH                                    | India                          | India                        | <i>E. coli</i> /410        | NDM-5          |
| <b>CP19<sup>b</sup></b> | 6 years/M         | HLH                                    | India                          | India                        | <i>K. pneumoniae</i> /2096 | OXA-232        |
| <b>CP20</b>             | 11 months/M       | Alexander disease, Hydrocephalus & VPS | Egypt                          | Egypt                        | <i>E. coli</i> /10         | NDM-5          |
| <b>CP21</b>             | 6 years/M         | Previously healthy                     | India                          | NO                           | <i>E. coli</i> /46         | NDM-5          |
| <b>CP22</b>             | 1 month/F         | Born and NICU admission in India       | India                          | India                        | <i>K. pneumoniae</i> /337  | NDM-1          |

|                         |             |                                                  |          |          |                            |                 |
|-------------------------|-------------|--------------------------------------------------|----------|----------|----------------------------|-----------------|
| <b>CP70</b>             | 10 month/M  | Prematurity & bladder Exstrophy surgery in Qatar | Egypt    | NO       | <i>K. pneumoniae</i> /441  | OXA-181         |
| <b>CP23<sup>c</sup></b> | 11 months/M | Down syndrome, CHD & Cardiac surgery             | Pakistan | Pakistan | <i>E. coli</i> /405        | NDM-5           |
| <b>CP36</b>             | 4 years/M   | Perforated appendicitis & Intraabdominal abscess | Egypt    | NO       | <i>E. coli</i> /410        | NDM-5           |
| <b>CP25</b>             | 1 year/M    | Retinoblastoma                                   | Egypt    | Egypt    | <i>E. coli</i> /3541       | OXA-244         |
| <b>E341<sup>c</sup></b> | 1 year/M    | Down syndrome, CHD & Cardiac surgery             | Pakistan | Pakistan | <i>K. pneumoniae</i> /336  | NDM-1           |
| <b>CP28</b>             | 9 years/F   | Osteosarcoma                                     | India    | India    | <i>E. coli</i> /2172       | NDM-5           |
| <b>CP72</b>             | 14 years/M  | Cardiac arrhythmia with pacemaker implanted      | Turkey   | Turkey   | <i>K. pneumoniae</i> /2731 | OXA-48          |
| <b>CP45</b>             | 14 years/F  | Burkitt Lymphoma                                 | India    | India    | <i>E. coli</i> /648        | NDM-5           |
| <b>CP46</b>             | 4 months/F  | CHD & RLRTI                                      | Somalia  | Somalia  | <i>E. coli</i> /58         | OXA-48          |
| <b>CP51</b>             | 5 years/M   | ESRD, HD & Bronchiectasis                        | Pakistan | Pakistan | <i>E. coli</i> /156        | OXA-181 & NDM-5 |
| <b>CP55<sup>d</sup></b> | 2 months    | CHD & NICU admission in Egypt                    | Egypt    | Egypt    | <i>E. coli</i> /361        | OXA-244 & NDM-5 |
| <b>CP56<sup>d</sup></b> | 2 months    | CHD & NICU admission in Egypt                    | Egypt    | Egypt    | <i>K. pneumoniae</i> /340  | OXA-48 & NDM-1  |
| <b>CP58</b>             | 11 months/M | CP, GDD & NICU                                   | Egypt    | Egypt    | <i>K. pneumoniae</i> /73   | NDM-1           |
| <b>CP59<sup>e</sup></b> | 2 years/M   | CHD & Cardiac surgery                            | Sudan    | India    | <i>K. pneumoniae</i> /73   | NDM-1           |

|                          |            |                                                   |        |        |                            |                    |
|--------------------------|------------|---------------------------------------------------|--------|--------|----------------------------|--------------------|
| <b>CP60<sup>e</sup></b>  | 2 years/M  | CHD & Cardiac surgery                             | Sudan  | India  | <i>K. pneumoniae</i> /17   | NDM-1              |
| <b>CP63<sup>f</sup></b>  | 1 year/F   | Tufting enteropathy                               | Kuwait | Kuwait | <i>K. oxytoca</i> /135     | OXA-48             |
| <b>CP64<sup>g</sup></b>  | 6 months/F | CP, GDD & RLRT                                    | Egypt  | Egypt  | <i>E. coli</i> /ND         | NDM-5              |
| <b>CP65<sup>g</sup></b>  | 6 months/F | CP, GDD & RLRT                                    | Egypt  | Egypt  | <i>K. pneumoniae</i> /397  | NDM-1              |
| <b>CP85<sup>h</sup></b>  | 6 years/M  | Ewing sarcoma                                     | Irak   | Irak   | <i>E. coli</i> /410        | NDM-5              |
| <b>CP86<sup>h</sup></b>  | 6 years/M  | Ewing sarcoma                                     | Irak   | Irak   | <i>K. pneumoniae</i> /147  | OXA-232 &<br>NDM-5 |
| <b>CP77</b>              | 13 years/F | ALL                                               | Turkey | NO     | <i>E. coli</i> /1421       | OXA-181            |
| <b>CP78<sup>i</sup></b>  | 9 months/M | CHD & Epilepsy                                    | Egypt  | Egypt  | <i>K. pneumoniae</i> /45   | OXA-48             |
| <b>CP79<sup>i</sup></b>  | 9 months/M | CHD & Epilepsy                                    | Egypt  | Egypt  | <i>Citrobacter</i> spp./ND | OXA-48             |
| <b>CP80</b>              | 8 years/M  | CP, hydrocephalus & VPS                           | India  | India  | <i>E. coli</i> /410        | OXA-181            |
| <b>CP82</b>              | 2 years/M  | Congenital hyperinsulinism                        | Egypt  | Egypt  | <i>K. pneumoniae</i> /39   | NDM-1              |
| <b>CP84</b>              | 23 months/ | Chromosomal abnormality,<br>CHD, GDD              | India  | NO     | <i>E. coli</i> /10         | OXA-181            |
| <b>CP85N<sup>j</sup></b> | 11 years/F | Medulloblastoma, tumor<br>excision, VPS insertion | India  | India  | <i>K. pneumoniae</i> /16   | OXA-181 &<br>NDM-5 |
| <b>CP87</b>              | 6 years/M  | Mitochondrial disease                             | India  | India  | <i>E. coli</i> /410        | OXA-181            |
| <b>CP89<sup>k</sup></b>  | 3 months/M | CHD & Cardiac surgery                             | Egypt  | Egypt  | <i>K. pneumoniae</i> /70   | NDM-5              |

|                         |            |                       |       |       |                     |         |
|-------------------------|------------|-----------------------|-------|-------|---------------------|---------|
| <b>CP90<sup>k</sup></b> | 3 months/M | CHD & Cardiac surgery | Egypt | Egypt | <i>E. coli</i> /405 | NDM-5   |
| <b>CP96<sup>l</sup></b> | 17 years/M | Aplastic anemia       | Egypt | NO    | <i>E. coli</i> /410 | OXA-244 |

**CP: Cerebral palsy; GDD: Global developmental delay; CHD: Congenital heart disease; RLRTI: Recurrent lower respiratory tract infections; HLH: Hemophagocytic lymphohistiocytosis; VPS: Ventriculoperitoneal shunt; NICU: Neonatal Intensive Care Unit; ESRD: End-stage renal disease; HD: Hemodialysis; AAL: Acute lymphoblastic leukemia.**

<sup>a</sup>Detected during a weekly screening in the second week of hospitalization in the Pediatric Intensive Care Unit.

<sup>b</sup>Detected simultaneously on the same patient shortly after returning from a holiday trip in India where the patient required healthcare. This patient developed two bloodstream infections 7 and 8 months later caused by different *E. coli* and *K. pneumoniae* species producing the same carbapenemase types detected during the first positive admission screening.

<sup>c</sup>Detected on the same patients during two different admission screenings.

<sup>d, e, g, h</sup>Detected on the same patients simultaneously during admission screenings.

<sup>f</sup>Detected during a weekly screening after 2 weeks of hospitalization in a General Pediatric Unit.

<sup>i</sup>Detected simultaneously on the same patient during a weekly screening in the second week of hospitalization in the Pediatric Intensive Care Unit.

<sup>j</sup>Developed a bloodstream infection caused by the same species producing the same carbapenemase 2 weeks later.

<sup>k</sup>Detected simultaneously on the same patient during a weekly screening on hospital day 20 in a General Pediatric Unit.

<sup>l</sup>Developed a bloodstream infection caused by the same species producing the same carbapenemase 3 weeks later.

**Supplementary Table S2.** Carbapenem-producing Enterobacterales isolated from fecal carriers without foreign travel history.

| <b>ID</b>               | <b>Age/gender</b> | <b>Underlying condition</b>                  | <b>Previous hospital admissions</b> | <b>Species/ ST</b>         | <b>Enzyme</b> |
|-------------------------|-------------------|----------------------------------------------|-------------------------------------|----------------------------|---------------|
| <b>CP1<sup>a</sup></b>  | 4 years/M         | Waardenburg syndrome & Hirschsprung disease  | YES                                 | <i>K. pneumoniae</i> / 429 | NDM-1         |
| <b>CP4<sup>a</sup></b>  | 4 years/M         | Waardenburg syndrome & Hirschsprung disease  | YES                                 | <i>E. coli</i> /127        | NDM-1         |
| <b>CP11</b>             | 6 months/F        | Down syndrome, CHD                           | YES                                 | <i>E. coli</i> /2206       | OXA244        |
| <b>CP26</b>             | 2 years/M         | Chiari malformation & Myelomeningocele & VPS | YES                                 | <i>E. coli</i> /410        | NDM-5         |
| <b>E431</b>             | 3 months/M        | Previously healthy, Circumcision             | YES                                 | <i>E. coli</i> /38         | OXA-244       |
| <b>CP30</b>             | 2 years/F         | ALL, Liver abscess & Abdominal surgery       | YES                                 | <i>E. coli</i> /38         | OXA-244       |
| <b>CP29</b>             | 14 years/M        | White matter disease, CP & epilepsy          | YES                                 | <i>E. coli</i> /448        | OXA-181       |
| <b>CP31<sup>b</sup></b> | 2 years/F         | Lysosomal storage disease, GDD & RLRTI       | YES                                 | <i>E. coli</i> /10         | OXA-181       |
| <b>CP33</b>             | 14 years/F        | Type-1 diabetes                              | YES                                 | <i>E. coli</i> /38         | OXA-244       |
| <b>CP34<sup>c</sup></b> | 4 years/F         | CP, GDD, Hydrocephalus & VP shunt            | YES                                 | <i>E. coli</i> /38         | OXA-244       |
| <b>CP38</b>             | 11 months/F       | GDD, RLRTI Hirschsprung disease              | YES                                 | <i>E. coli</i> /38         | OXA-48        |
| <b>CP39</b>             | 14 months/F       | CHARGE syndrome & CHD                        | YES                                 | <i>E. coli</i> /13         | NDM-1         |
| <b>CP40</b>             | 16 years/F        | CP, GDD & Orthopedic surgeries               | YES                                 | <i>E. coli</i> /38         | OXA-244       |

|                          |            |                                            |     |                             |                |
|--------------------------|------------|--------------------------------------------|-----|-----------------------------|----------------|
| <b>CP41</b>              | 1 year/M   | Cystic fibrosis & Pancreatic insufficiency | YES | <i>K. pneumoniae</i> / 73   | NDM-5          |
| <b>CP42<sup>b</sup></b>  | 2 years/F  | Lysosomal storage disease, GDD & RAP       | YES | <i>E. coli</i> /450         | OXA-181        |
| <b>CP43<sup>b</sup></b>  | 2 years/F  | Lysosomal storage disease, GDD & RAP       | YES | <i>K. pneumoniae</i> / 4961 | OXA-181        |
| <b>CP57</b>              | 11 years/M | CP, epilepsy & Orthopedic surgeries        | YES | <i>E. coli</i> /354         | OXA-181        |
| <b>CP61</b>              | 10 days/F  | Neonatal apnea & NICU stay                 | YES | <i>E. coli</i> /167         | NDM-5          |
| <b>CP66</b>              | 14 years/M | Liver transplant                           | YES | <i>E. coli</i> /410         | OXA-181        |
| <b>CP75<sup>d</sup></b>  | 9 years/M  | Previously healthy                         | NO  | <i>E. coli</i> /38          | OXA-244        |
| <b>CP86N<sup>e</sup></b> | 17 years/M | Hodgkin's disease                          | YES | <i>E. coli</i> /167         | OXA-244        |
| <b>CP81</b>              | 2 years/M  | Mucopolysaccharidosis                      | YES | <i>E. coli</i> /617         | NDM-5          |
| <b>CP93</b>              | 3-years/M  | CML                                        | YES | <i>E. coli</i> /405         | NDM-5          |
| <b>CP94</b>              | 13 days/M  | GAS sepsis, NICU stay                      | YES | <i>K. pneumoniae</i> /17    | NDM-7          |
| <b>CP95</b>              | 7 months/F | Previously healthy                         | NO  | <i>E. coli</i> /648         | NDM-7          |
| <b>CP98</b>              | 9 years/M  | Brain tumor, tumor excision                | YES | <i>E. coli</i> /38          | OXA-244        |
| <b>CP99</b>              | 2 years/M  | CP, GDD & NICU                             | YES | <i>K. pneumoniae</i> /14    | OXA-48 & NDM-1 |
| <b>CP101</b>             | 6 years/F  | Previously healthy                         | NO  | <i>E. coli</i> /38          | OXA-244        |
| <b>CP102</b>             | 3 years/M  | Primary immunodeficiency                   | YES | <i>K. pneumoniae</i> /ND    | NDM-5          |

**CHD: Congenital heart disease; VPS: Ventriculoperitoneal shunt; AAL: Acute lymphoblastic leukemia; CP: Cerebral palsy; GDD: Global developmental delay; RLRTI: Recurrent lower respiratory tract infections; RAP: Recurrent aspiration pneumonia; NICU: Neonatal Intensive care Unit; CML: Chronic myeloid leukemia; GAS: Group A *Streptococcus*; ND: Not determined.**

<sup>a</sup>Detected on the same patient simultaneously during admission screening.

<sup>b</sup>Detected on the same patient. CP31 during the first admission screening, whereas CP42 and CP43 were detected simultaneously during a new admission screening 3 months later.

<sup>c</sup>Detected during a weekly screening after 4 weeks in a General Pediatric Unit.

<sup>d</sup>Detected during a weekly screening in the second week of hospitalization in the Pediatric Intensive Care Unit.

<sup>e</sup>Detected during a weekly screening after 2 weeks of hospitalization in a General Pediatric Unit.

|                                             | <b>2018</b>    | <b>2019</b>     | <b>2020</b>     | <b>Quarterly average pre-travel restrictions</b> | <b>Quarterly average post-travel restrictions</b> |
|---------------------------------------------|----------------|-----------------|-----------------|--------------------------------------------------|---------------------------------------------------|
| <b>Pediatric admissions</b>                 | 11,760         | 20,646          | 20,583          | 4575                                             | 5165                                              |
| <b>PICU admissions</b>                      | 838            | 1356            | 1064            | 303                                              | 253                                               |
| <b>NICU admissions</b>                      | 541            | 725             | 794             | 177                                              | 197                                               |
| <b>Rectal swabs and positivity rate (%)</b> | 3013<br>(0.9%) | 6555<br>(0.37%) | 6778<br>(0.19%) | 1390<br>(0.54)                                   | 1660<br>(0.08)                                    |

**Supplementary Table S3.** First three columns show the annual number of Pediatric, PICU, and NICU admissions during the study period. Also, the annual number of rectal screening swabs and the corresponding positivity rate are shown in these columns. Last two columns show quarterly average of admissions, rectal swabs, and positivity rate before (second quarter 2018 to first quarter 2020) and after (second quarter 2020 to fourth quarter 2020) the implementation of COVID-19 related travel restrictions in Qatar.



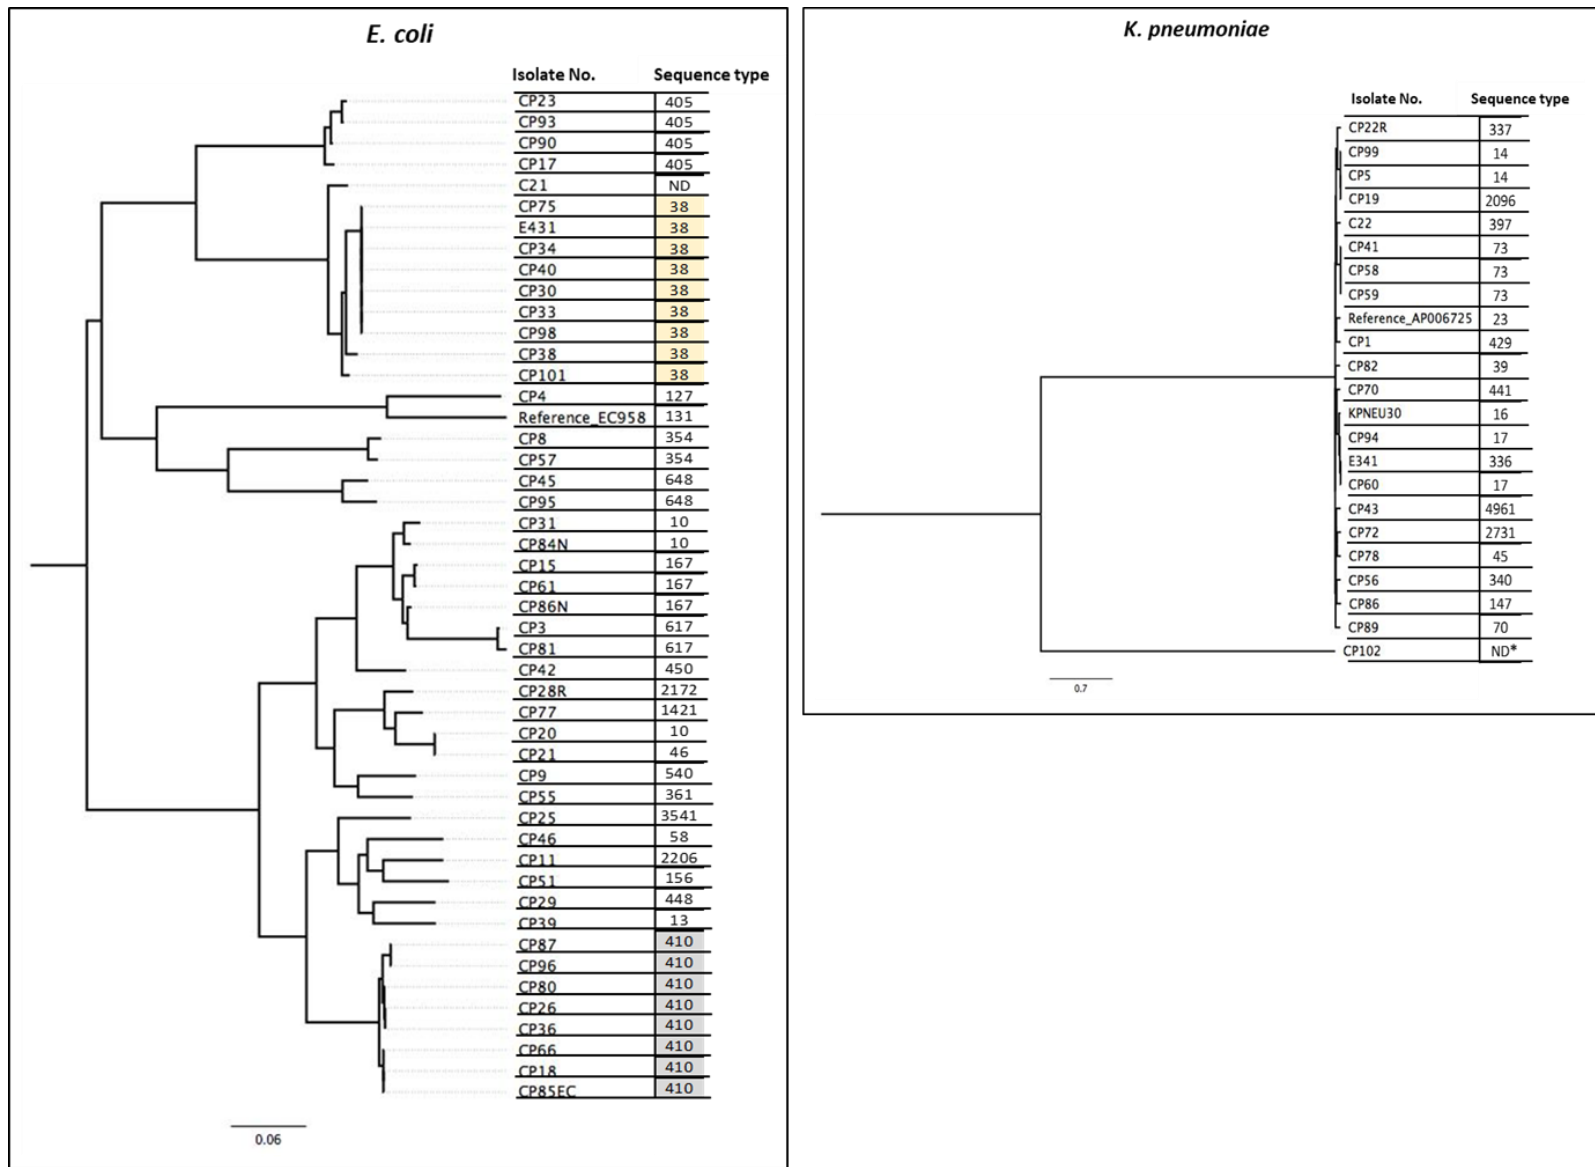

**Supplementary Figure S1.** Dendrograms showing genetic relatedness of 47 carbapenemase-producing *Escherichia coli* and 22 *Klebsiella pneumoniae* isolates. \**K. quasipneumoniae* subsp *quasipneumoniae*
